# Supplementary material for: Studies on mechanical, thermal and dynamic mechanical properties of functionalized nanoalumina reinforced sulphone ether linked tetraglycidyl epoxy nanocomposites
Source: Royal Society of Chemistry journal article supplement (doi:10.1039/c4ra06511e), 2014-01-01
Supplement: c4ra06511e1.pdf [file c4ra06511e1.pdf]

## Studies on mechanical, thermal and dynamic mechanical properties of functionalized nanoalumina/reinforced sulphone ether linked tetra glycidyl-toughened epoxy nanocomposites

D. Duraibabu<sup>a</sup>, M. Alagar<sup>b</sup> and S. Ananda Kumar<sup>a\*</sup>

<sup>a</sup>Department of Chemistry, Anna University, Chennai 600025, India.

<sup>b</sup>Department of Chemical Engineering, Anna University, Chennai 600025, India.

\*sri\_anand\_72@yahoo.com

Tel. No: +91 44-22358661. Fax. No: 91-44-22200660

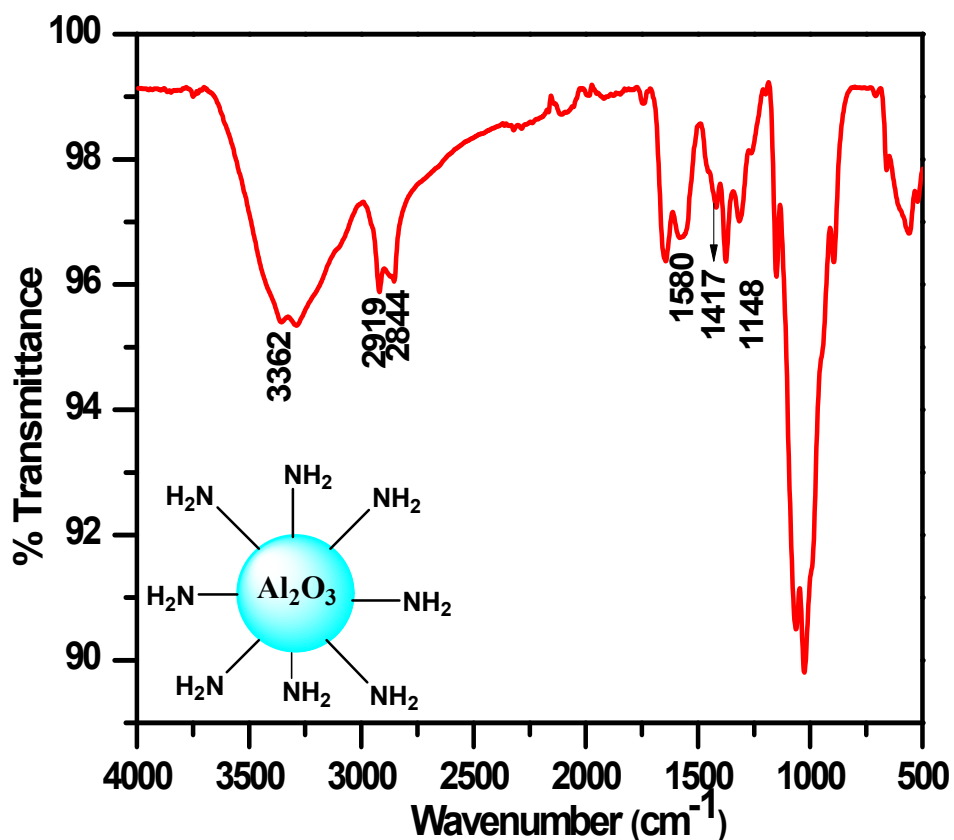

Fig. S1. FT-IR spectrum of F-nAl

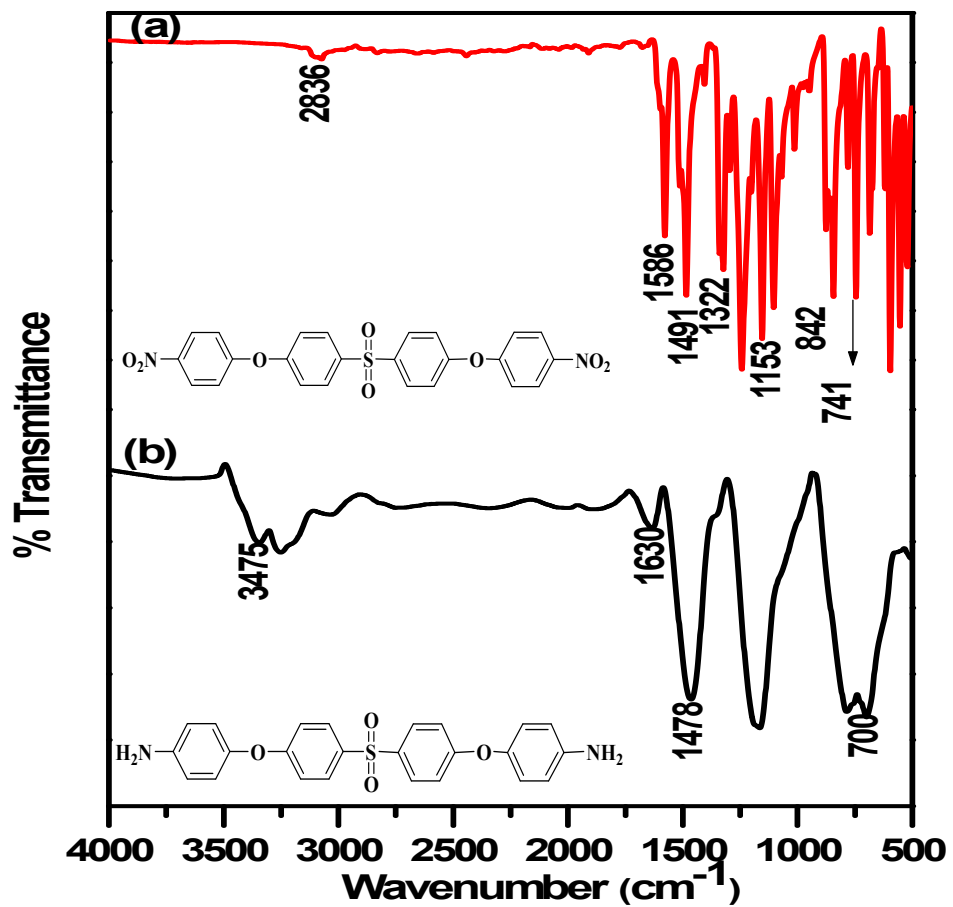

Fig. S2. FT-IR spectra of (a) BNPSB (b) BAPSB

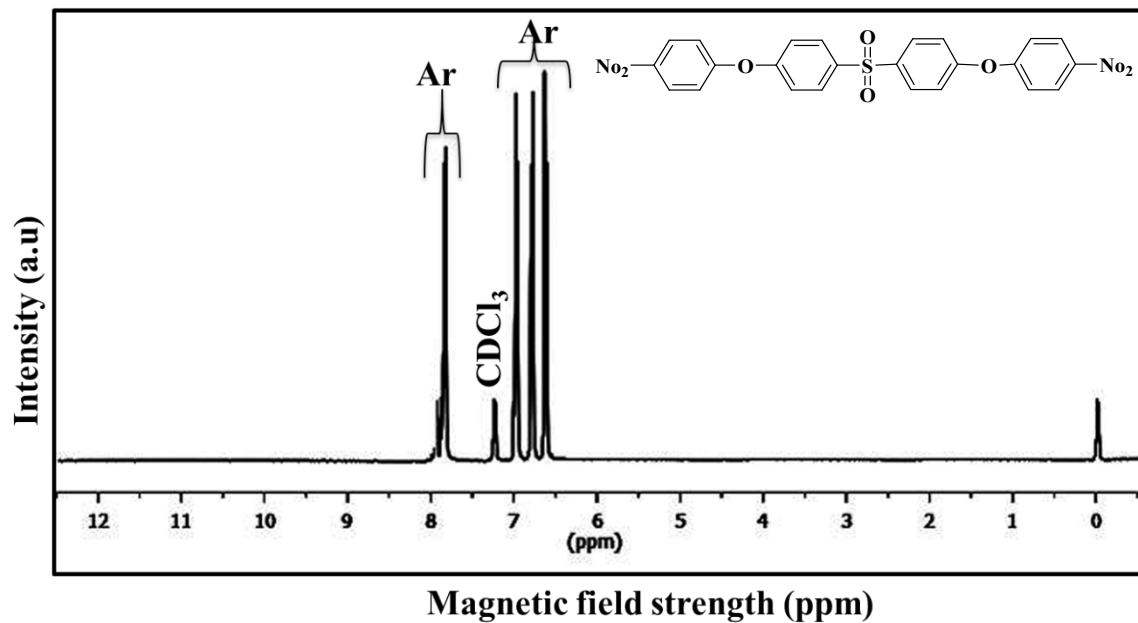

Fig. S4.  $^1\text{H NMR}$  spectrum of BNPSB

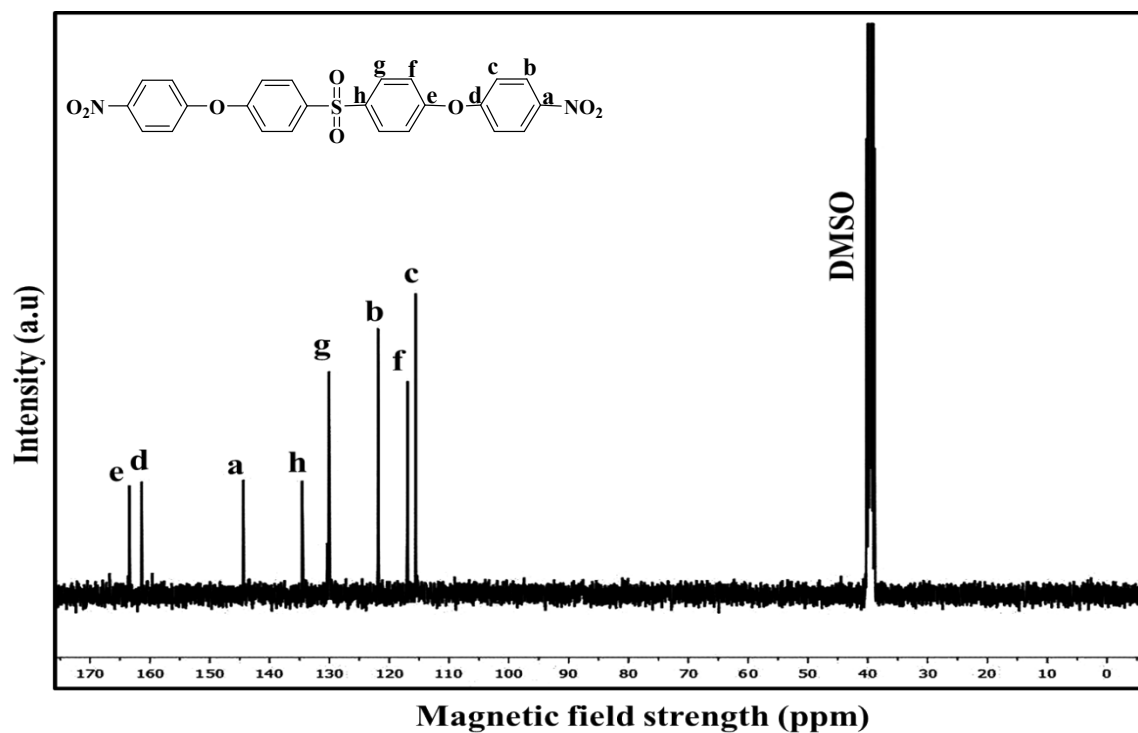

Fig. S5.  $^{13}\text{C NMR}$  spectrum of BNPSB

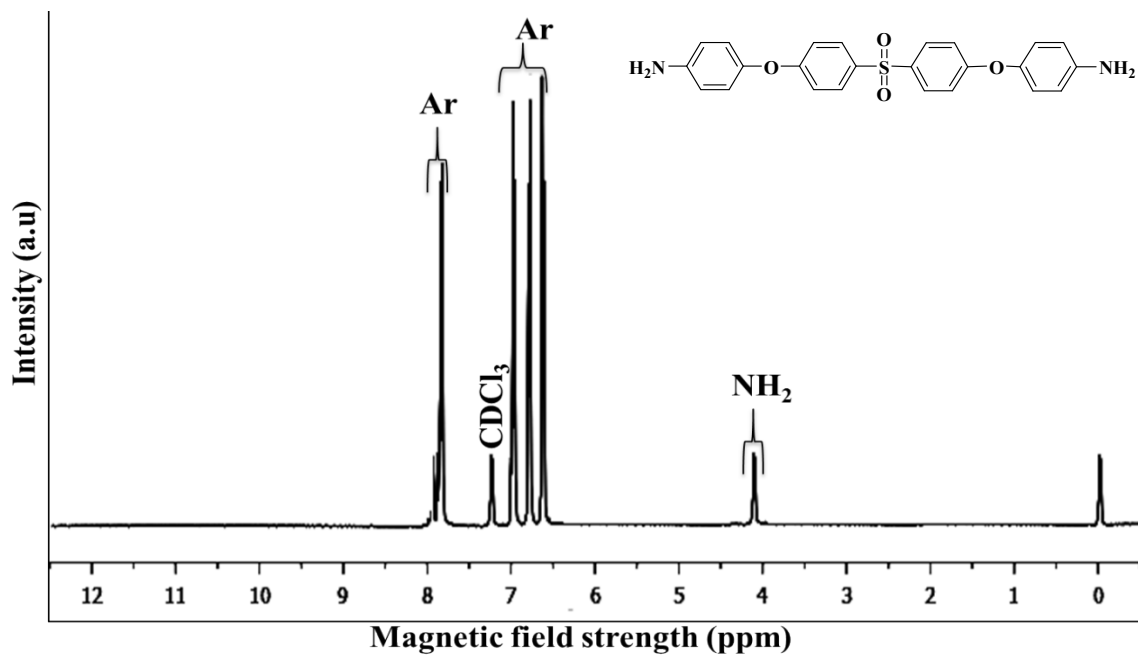

Fig. S6. <sup>1</sup>H NMR spectrum of BAPSB

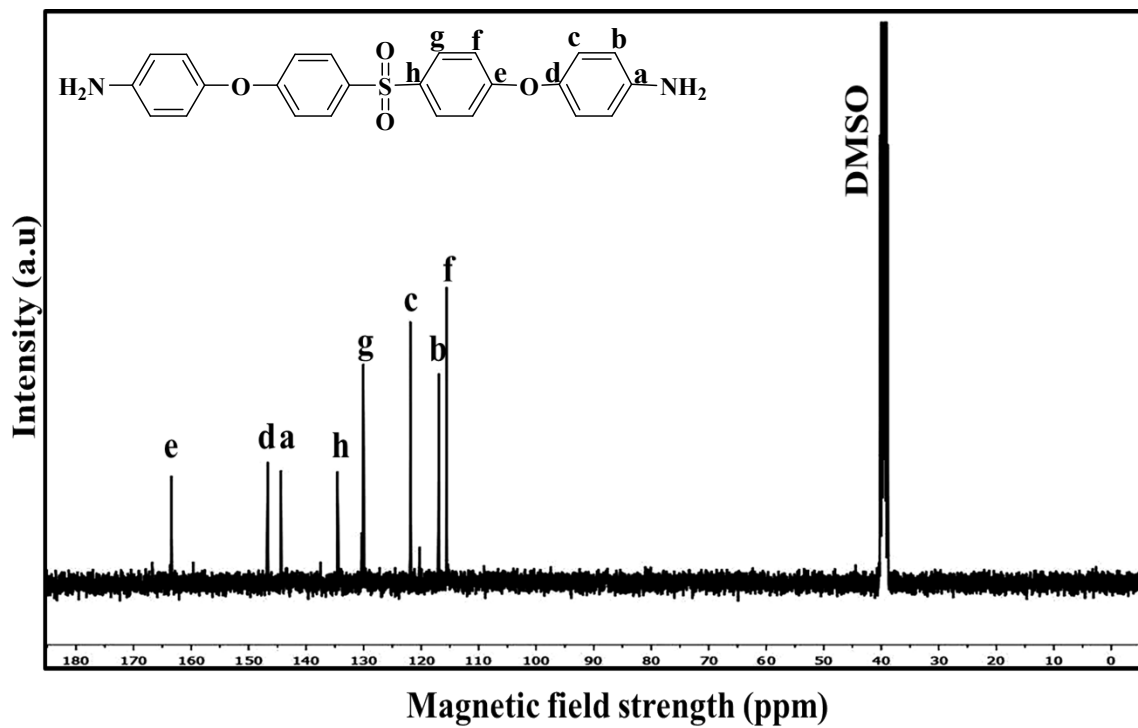

Fig. S7.  $^{13}\text{C}$ NMR spectrum of BAPSB

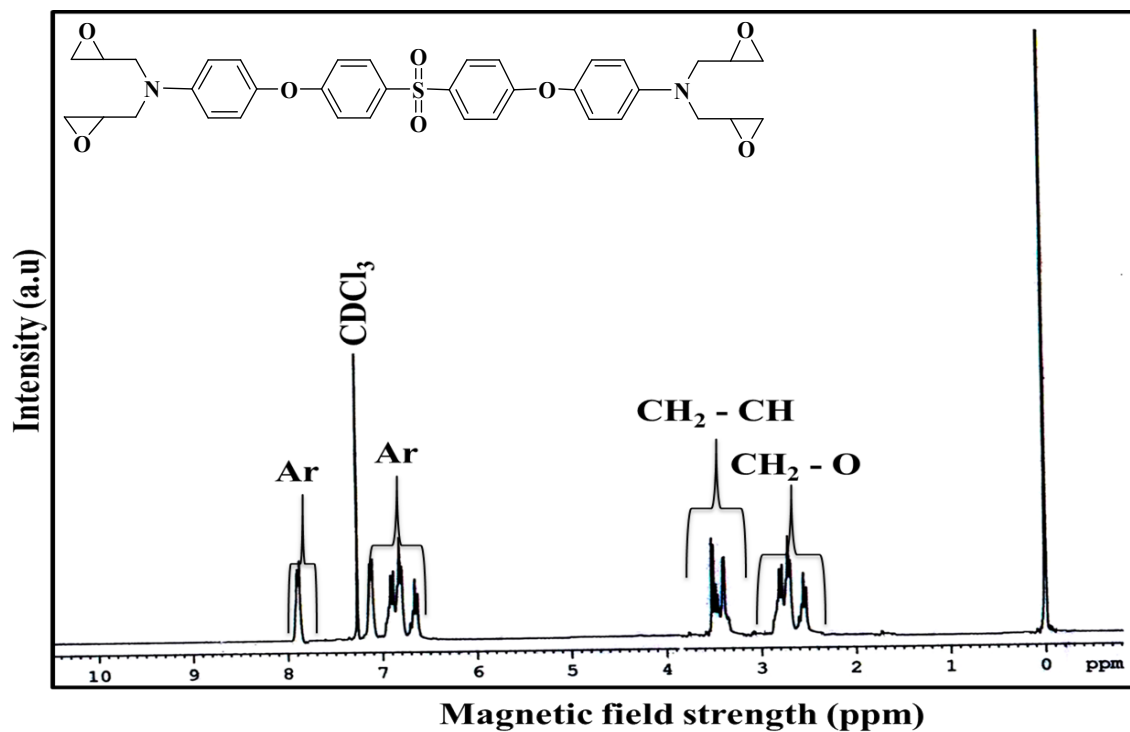

Fig. S8.  $^1\text{H}$ NMR spectrum of TGBAPSB epoxy resin

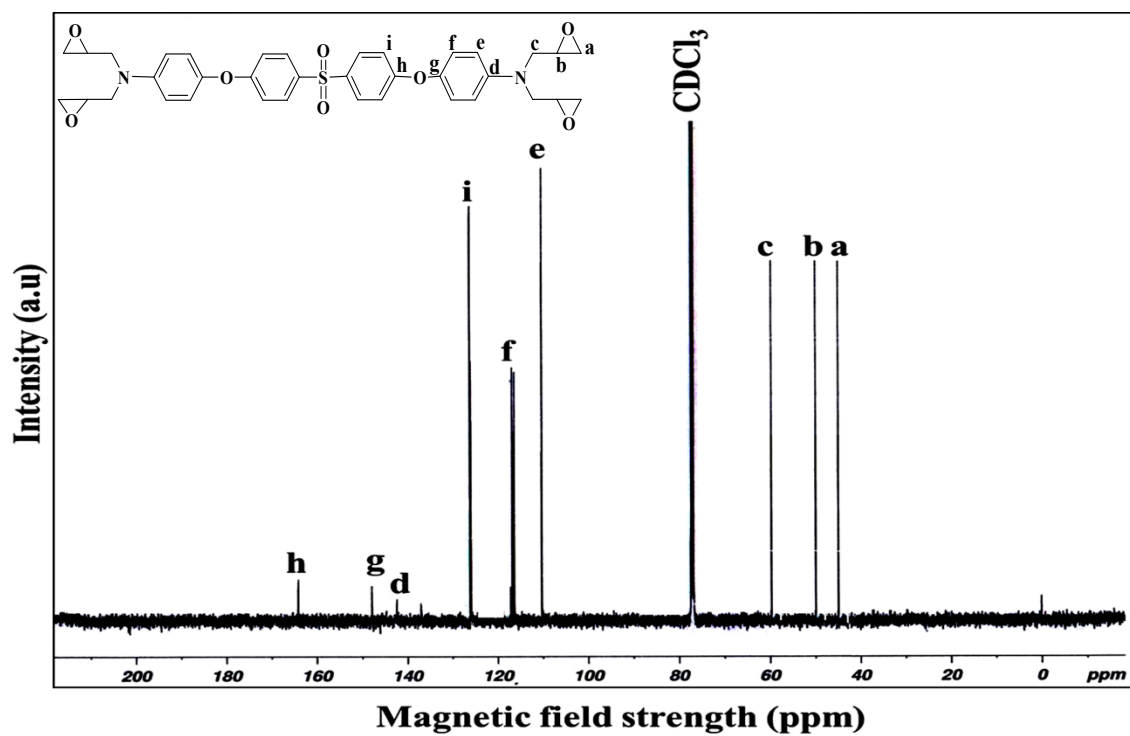

Fig. S9.  $^{13}\text{C}$ NMR spectrum of TGBAPSB epoxy resin

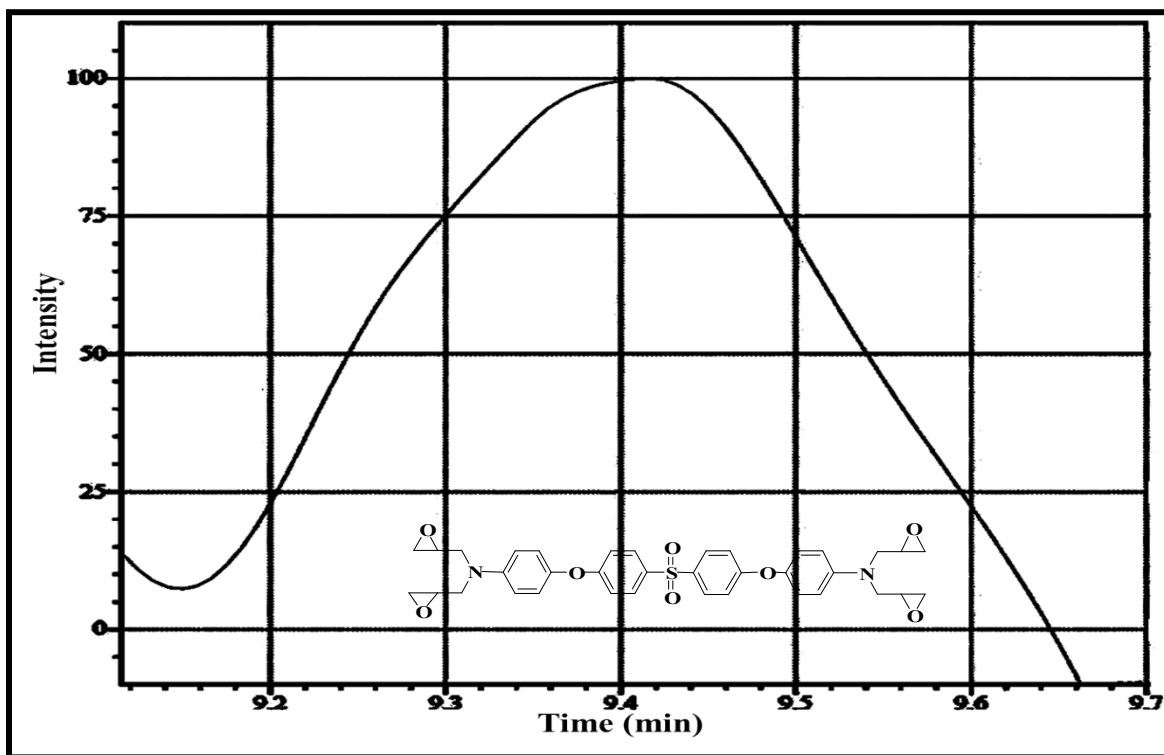

Fig. S10. GPC of TGBAPSB epoxy resin

Table S1

Nomenclature of TGBAPSB epoxy nanocomposites

| System | TGBAPSB/% F-nAl | Curative |
|--------|-----------------|----------|
| a      | 100/0           | DDM      |
| b      | 100/1           | DDM      |
| c      | 100/3           | DDM      |
| d      | 100/5           | DDM      |

Table S2

Data on mechanical properties of TGBAPSB epoxy nanocomposites

| <b>System</b> | <b>TGBAPSB/%F-nAl</b> | <b>Tensile<br/>Strength<br/>(MPa)</b> | <b>Flexural<br/>strength<br/>(MPa)</b> | <b>Impact<br/>strength<br/>(J/m)</b> |
|---------------|-----------------------|---------------------------------------|----------------------------------------|--------------------------------------|
| a             | 100/0                 | 84.3±5                                | 170.3±1                                | 197.4±3                              |
| b             | 100/1                 | 104.5±2                               | 191.4±3                                | 218.3±1                              |
| c             | 100/3                 | 124.5±3                               | 212.5±1                                | 238.4±2                              |
| d             | 100/5                 | 106.4±2                               | 189.5±1                                | 216.3±3                              |

Table S3

DMA results of TGBAPSB epoxy nanocomposites

| <b>System</b> | <b>TGBAPSB /% F-nAl</b> | <b>Storage modulus<br/>(GPa)</b> | <b>Glass transition temperature,<br/>T<sub>g</sub> (°C)</b> |
|---------------|-------------------------|----------------------------------|-------------------------------------------------------------|
| a             | 100/0                   | 3.2                              | 145                                                         |
| b             | 100/1                   | 3.3                              | 188                                                         |
| c             | 100/3                   | 4.8                              | 203                                                         |
| d             | 100/5                   | 2.4                              | 176                                                         |
